# Supplementary material
Source: PubMed Central journal article supplement (PMC3918811)
Supplement: 1317350111_sapp.pdf [file 1317350111_sapp.pdf]

**SI**

| exposure and year<br>year collected | Primary DENV-3 50% Neutralization Titers |            |               |                |
|-------------------------------------|------------------------------------------|------------|---------------|----------------|
|                                     | Donor 003                                | Donor 033  | Donor 105     | Donor 118      |
|                                     | Thailand 2001                            | India 2005 | Thailand 2002 | Nicaragua 2009 |
|                                     | 2005                                     | 2006       | 2010          | 2010           |
| DENV 1                              | 1:30                                     | <1:20      | <1:20         | 1:60           |
| DENV 2                              | 1:87                                     | <1:20      | <1:20         | 1:32           |
| DENV 3                              | 1:338                                    | 1:426      | 0.1875        | 1:980          |
| DENV 4                              | <1:20                                    | 1:25       | <1:20         | 1:76           |

**SI Table S1:** Panel of previously characterized human primary DENV-3 immune sera. FRNT<sub>50</sub> titers were determined against prototype DENV viruses West Pac '74 (DENV-1), S-16803 (DENV-2), CH53489 (DENV-3) and TVP-360 (DENV-4).

| Exposure and Year | Primary DENV-4 50% Neutralization Titers |          |          |          |
|-------------------|------------------------------------------|----------|----------|----------|
|                   | Donor 102                                | Donor 97 | Donor 98 | Donor 99 |
|                   | Honduras 2007                            | unknown  | unknown  | unknown  |
| DENV 1            | <1:20                                    | <1:20    | <1:20    | <1:20    |
| DENV 2            | <1:20                                    | <1:20    | <1:20    | <1:20    |
| DENV 3            | <1:20                                    | <1:20    | <1:20    | <1:20    |
| DENV 4            | 1:422                                    | 1:146    | >1:1280  | 1:867    |

**SI Table S2:** Panel of previously characterized human primary DENV-4 immune sera. FRNT<sub>50</sub> titers were determined against prototype DENV viruses West Pac '74 (DENV-1), S-16803 (DENV-2), CH53489 (DENV-3) and TVP-360 (DENV-4).

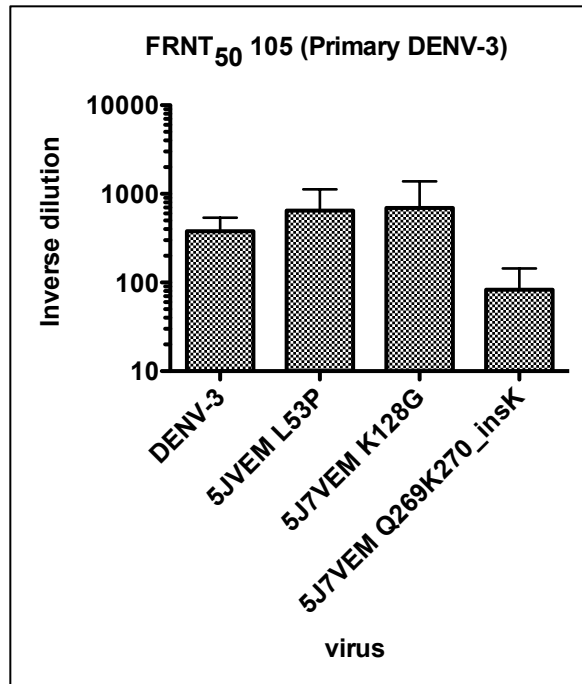

**SI Figure S1:** FRNT<sub>50</sub> values for the parental rDENV-3 infectious clone, parental rDENV-4 and rDENV-3/4 against donor 105 immune sera. The Y-axis shows serum dilution that neutralized 50% of input virus on a log scaled. X-axis shows input virus. Error bars show 95% CIs.

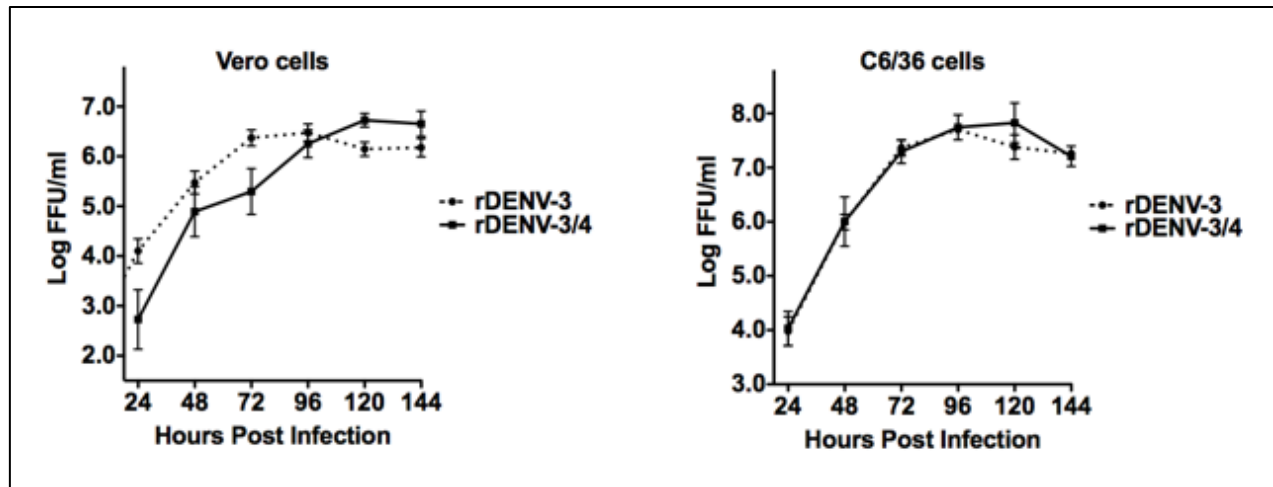

**SI Figure S2:** Vero E6 and C6/36 cells were inoculated at a multiplicity of infection (m.o.i) of 0.01 FFU. Cell culture supernatants were harvested at indicated times and the virus released from the infected cells was quantitated by immunofocus assay. Points show geometric mean titer (GMT) calculated from triplicate titrations. Error bars indicate 95% confidence intervals for each GMT. No focus forming units were observed at 0 hrs.

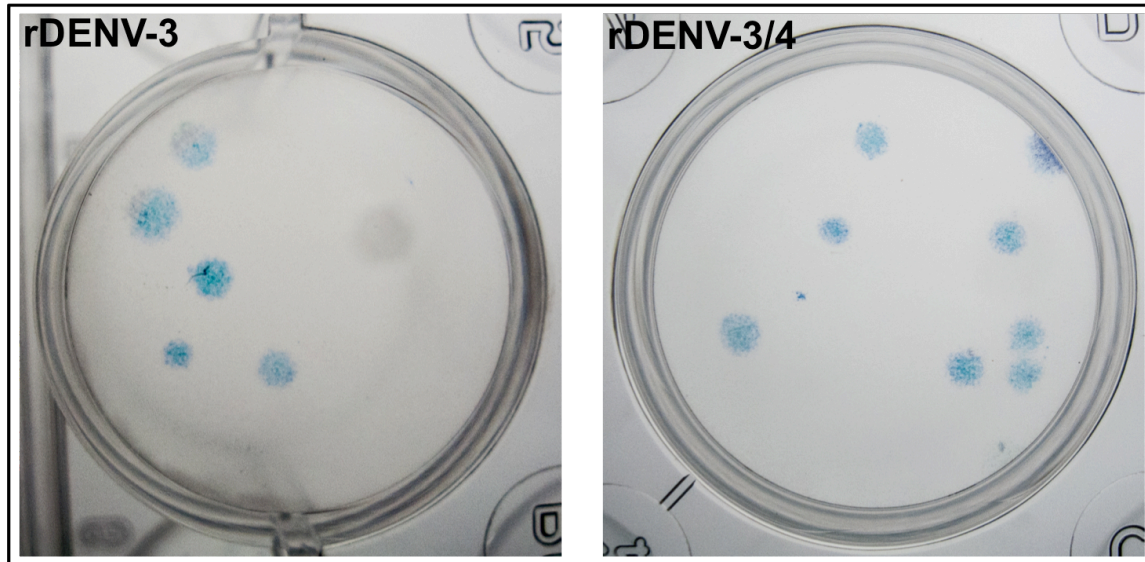

**SI Figure S3:** Focus formation by rDENV-3 and rDENV-3/4. Approximately 5 – 10 focus forming units/well were inoculated onto 90% confluent Vero E6 cells, overlaid with 1% methylcellulose and incubated for 5 days. Cells were fixed and foci visualized by immunostaining with monoclonal antibody 4G2 followed by horse-radish peroxidase (HRP) conjugated goat-anti-mouse secondary antibody and addition of True Blue (KPL) HRP substrate.

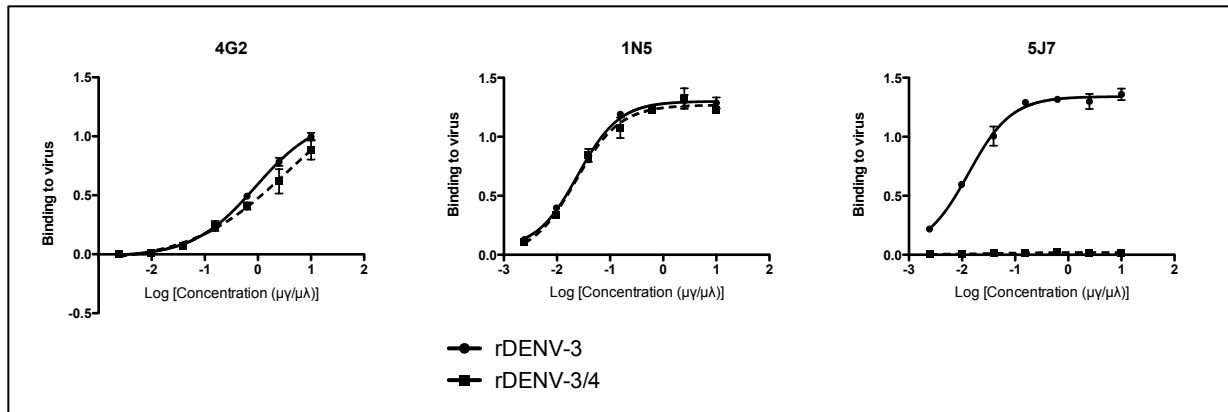

**SI Figure S4:** ELISA binding of whole rDENV-3 and rDENV-3/4 by E specific monoclonal antibodies 4G2, 1N5 and 5J7. The Y-axis shows relative optical density (OD) and the X-axis shows antibody concentration.

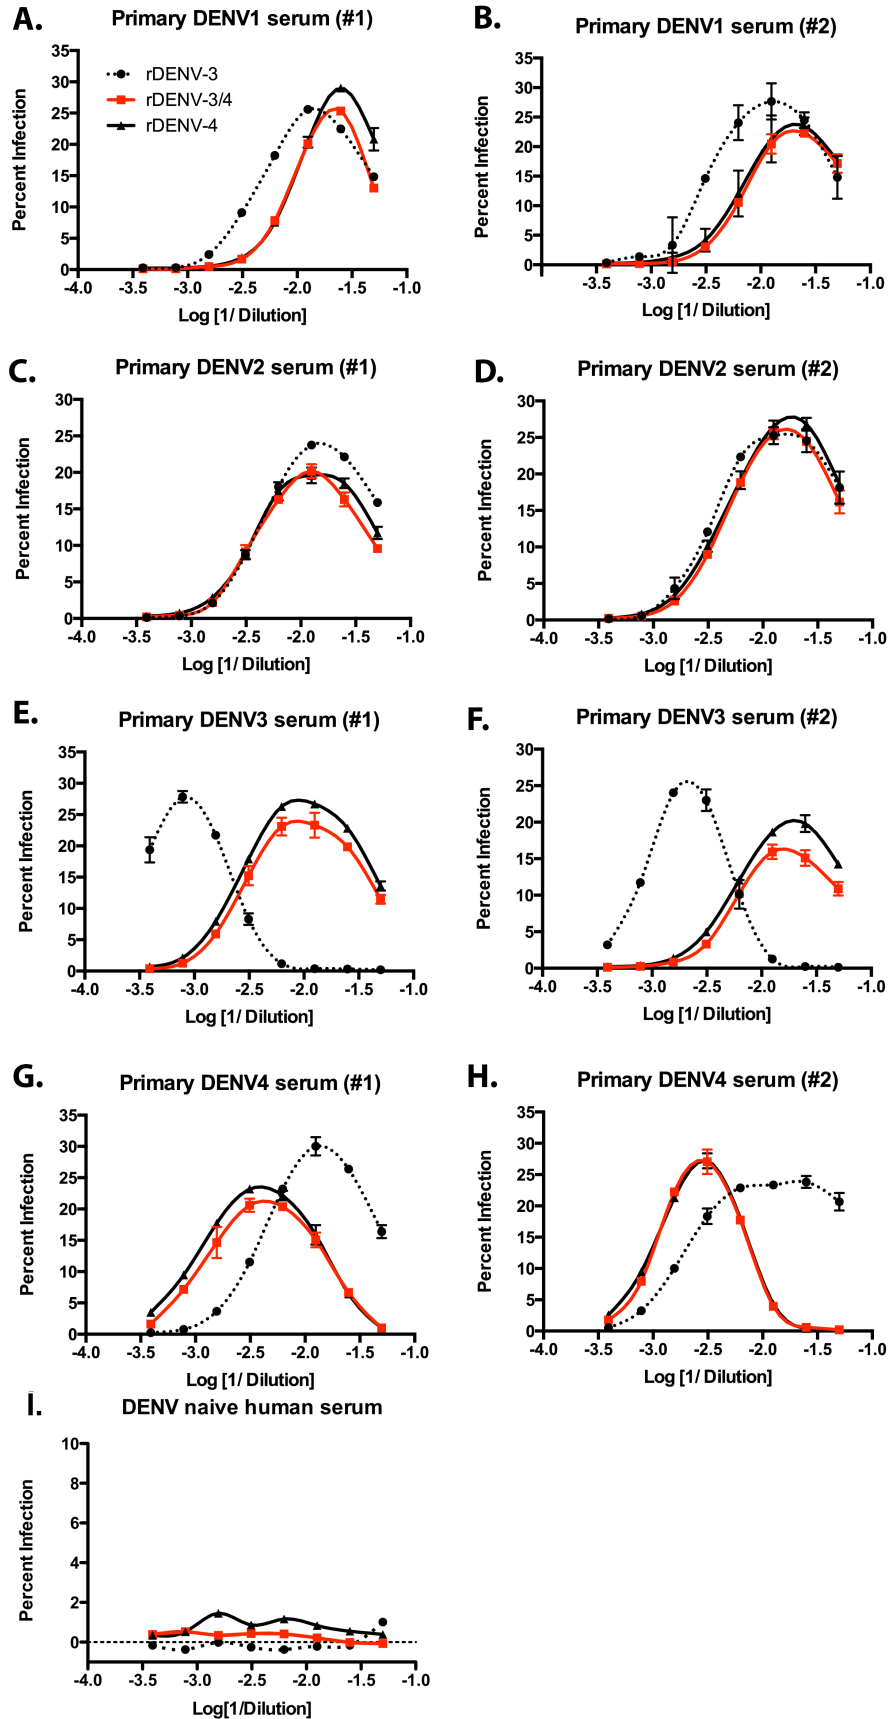

**SI Figure S5.** Antibody Dependent Enhancement of parental and recombinant DENVs by human primary sera in K562 cells. All above viruses display similar enhancement curves with heterologous DENV1 and DENV2 primary immune sera. At high concentrations primary DENV3 immune sera enhanced the rDENV4 and the rDENV3/4 chimera, but not rDENV3. At high concentrations primary DENV4 immune sera enhanced rDENV3, but not rDENV4 or the rDENV3/4 chimera. Strongly neutralizing sera that failed to enhance at high concentrations did enhance at low concentrations when antibodies were diluted to sub-neutralizing levels. The X-axis shows inverse log fold-dilution of sera. The Y-axis shows percent of K562 cells infected with DENV at a given serum concentration (X-axis) as measured by flow-cytometry. I shows enhancement of DENV-3, DENV-4 and rDENV-3/4 by DENV naïve human serum. Error bars show standard error.
